# Supplementary material for: Effects of Drought Stress on the Morphological Structure and Flower Organ Physiological Characteristics of Camellia oleifera Flower Buds
Source: MDPI journal article supplement (doi:10.3390/plants12132585), 2023-07-07
Supplement: s1 [file s1]

## Supplementary Materials

**Table S1.** Labels for the materials in this experiment.

| Cultivar | Drought stress time | Label                    |
|----------|---------------------|--------------------------|
| 'Huaxin' | 15d                 | HX-15d-CK1 to HX-15d CK3 |
|          |                     | HX-15d-DS1 to HX-15d DS3 |
|          | 30d                 | HX-30d-CK1 to HX-30d CK3 |
|          |                     | HX-30d-DS1 to HX-30d DS3 |
|          | 45d                 | HX-45d-CK1 to HX-45d CK3 |
|          |                     | HX-45d-DS1 to HX-45d DS3 |

**Table S2.** The effect of drought stress on the Relative Water content of *C. oleifera* petals.

| Descriptives |    |        |                |            |                             |             |         |         |
|--------------|----|--------|----------------|------------|-----------------------------|-------------|---------|---------|
|              | N  | Mean   | Std. Deviation | Std. Error | 95% Confidence Interval for |             | Minimum | Maximum |
|              |    |        |                |            | Mean                        |             |         |         |
|              |    |        |                |            | Lower Bound                 | Upper Bound |         |         |
| 15d CK       | 3  | 0.8574 | 0.0115         | 0.0066     | 0.8289                      | 0.8858      | 0.8459  | 0.8688  |
| 15d DS       | 3  | 0.8373 | 0.0045         | 0.0026     | 0.8260                      | 0.8485      | 0.8321  | 0.8406  |
| 30d CK       | 3  | 0.8568 | 0.0048         | 0.0028     | 0.8448                      | 0.8688      | 0.8534  | 0.8623  |
| 30d DS       | 3  | 0.8270 | 0.0035         | 0.0020     | 0.8184                      | 0.8356      | 0.8236  | 0.8305  |
| 45d CK       | 3  | 0.8652 | 0.0054         | 0.0031     | 0.8518                      | 0.8786      | 0.8598  | 0.8706  |
| 45d DS       | 3  | 0.7977 | 0.0052         | 0.0030     | 0.7848                      | 0.8106      | 0.7932  | 0.8034  |
| Total        | 18 | 0.8402 | 0.0243         | 0.0057     | 0.8281                      | 0.8523      | 0.7932  | 0.8706  |

**Table S3.** The effect of drought stress on the significant difference in Relative Water content among groups of *C. oleifera* petals.

|                                                        |               | N | Subset for alpha = 0.05 |         |        |
|--------------------------------------------------------|---------------|---|-------------------------|---------|--------|
|                                                        |               |   | 1                       | 2       | 3      |
| Duncan <sup>a</sup>                                    | <u>45d DS</u> | 3 | 0.7977                  |         |        |
|                                                        | 30d DS        | 3 |                         | 0.8270  |        |
|                                                        | 15d DS        | 3 |                         | 0.8373  |        |
|                                                        | 30d CK        | 3 |                         |         | 0.8568 |
|                                                        | 15d CK        | 3 |                         |         | 0.8574 |
|                                                        | 45d CK        | 3 |                         |         | 0.8652 |
|                                                        | Sig.          |   | 1.000                   | 0.07200 | 0.1480 |
| Means for groups in homogeneous subsets are displayed. |               |   |                         |         |        |
| a. Uses Harmonic Mean Sample Size = 3.000.             |               |   |                         |         |        |

**Table S4.** The effect of drought stress on the Relative conductivity of *C. oleifera* petals.

| Descriptives |    |        |                |            |                             |             |         |         |
|--------------|----|--------|----------------|------------|-----------------------------|-------------|---------|---------|
|              | N  | Mean   | Std. Deviation | Std. Error | 95% Confidence Interval for |             | Minimum | Maximum |
|              |    |        |                |            | Mean                        |             |         |         |
|              |    |        |                |            | Lower Bound                 | Upper Bound |         |         |
| 15d CK       | 3  | 0.2217 | 0.0074         | 0.0043     | 0.2033                      | 0.2400      | 0.2135  | 0.2279  |
| 15d DS       | 3  | 0.2375 | 0.0012         | 0.0007     | 0.2345                      | 0.2405      | 0.2364  | 0.2388  |
| 30d CK       | 3  | 0.2206 | 0.0049         | 0.0028     | 0.2085                      | 0.2327      | 0.2154  | 0.2251  |
| 30d DS       | 3  | 0.2431 | 0.0034         | 0.0020     | 0.2346                      | 0.2517      | 0.2394  | 0.2462  |
| 45d CK       | 3  | 0.2241 | 0.0043         | 0.0025     | 0.2135                      | 0.2346      | 0.2197  | 0.2282  |
| 45d DS       | 3  | 0.2536 | 0.0033         | 0.0019     | 0.2455                      | 0.2618      | 0.2503  | 0.2569  |
| Total        | 18 | 0.2334 | 0.0132         | 0.0031     | 0.2269                      | 0.2400      | 0.2135  | 0.2569  |

**Table S5.** The effect of drought stress on the significant difference in Relative conductivity among groups of *C. oleifera* petals.

|                                                        |        | N | Subset for alpha = 0.05 |        |        |
|--------------------------------------------------------|--------|---|-------------------------|--------|--------|
|                                                        |        |   | 1                       | 2      | 3      |
| Duncan <sup>a</sup>                                    | 30d CK | 3 | 0.2206                  |        |        |
|                                                        | 15d CK | 3 | 0.2217                  |        |        |
|                                                        | 45d CK | 3 | 0.2241                  |        |        |
|                                                        | 15d DS | 3 |                         | 0.2376 |        |
|                                                        | 30d DS | 3 |                         | 0.2431 |        |
|                                                        | 45d DS | 3 |                         |        | 0.2536 |
|                                                        | Sig.   |   | 0.3860                  | 0.1520 | 1.000  |
| Means for groups in homogeneous subsets are displayed. |        |   |                         |        |        |
| a. Uses Harmonic Mean Sample Size = 3,000.             |        |   |                         |        |        |

**Table S6.** The effect of drought stress on the MDA content of *C. oleifera* petals.

| Descriptives |    |          |                |            |                             |             |          |          |
|--------------|----|----------|----------------|------------|-----------------------------|-------------|----------|----------|
|              | N  | Mean     | Std. Deviation | Std. Error | 95% Confidence Interval for |             | Minimum  | Maximum  |
|              |    |          |                |            | Mean                        |             |          |          |
|              |    |          |                |            | Lower Bound                 | Upper Bound |          |          |
| HX15d CK     | 3  | 72.7400  | 4.2260         | 2.4399     | 62.2420                     | 83.2380     | 69.2800  | 77.4500  |
| HX30d DS     | 3  | 100.4367 | 4.9484         | 2.8570     | 88.1441                     | 112.7292    | 97.1700  | 106.1300 |
| HX45d CK     | 3  | 113.8800 | 9.9792         | 5.7615     | 89.0903                     | 138.6697    | 102.3800 | 120.2600 |
| HX15d DS     | 3  | 83.9233  | 1.2378         | 0.7147     | 80.8484                     | 86.9983     | 82.5200  | 84.8600  |
| HX30d DS     | 3  | 113.2700 | 4.8934         | 2.8252     | 101.1142                    | 125.4258    | 110.3900 | 118.9200 |
| HX45d DS     | 3  | 126.6967 | 7.0425         | 4.0660     | 109.2021                    | 144.1912    | 119.1600 | 133.1100 |
| Total        | 18 | 101.8244 | 19.7391        | 4.6526     | 92.0084                     | 111.6405    | 69.2800  | 133.1100 |

|                     |          |   | Subset for alpha = 0.05 |         |          |          |          |
|---------------------|----------|---|-------------------------|---------|----------|----------|----------|
| N                   |          |   | 1                       | 2       | 3        | 4        | 5        |
| Duncan <sup>a</sup> | HX15d CK | 3 | 72.7400                 |         |          |          |          |
|                     | HX15d DS | 3 |                         | 83.9233 |          |          |          |
|                     | HX30d DS | 3 |                         |         | 100.4367 |          |          |
|                     | HX30d DS | 3 |                         |         |          | 113.2700 |          |
|                     | HX45d CK | 3 |                         |         |          | 113.8800 |          |
|                     | HX45d DS | 3 |                         |         |          |          | 126.6967 |
|                     | Sig.     |   | 1.000                   | 1.000   | 1.000    | 0.9030   | 1.000    |

Means for groups in homogeneous subsets are displayed.  
a. Uses Harmonic Mean Sample Size = 3,000.

| Descriptives |    |           |                |            |                             |             |           |           |
|--------------|----|-----------|----------------|------------|-----------------------------|-------------|-----------|-----------|
|              | N  | Mean      | Std. Deviation | Std. Error | 95% Confidence Interval for |             | Minimum   | Maximum   |
|              |    |           |                |            | Mean                        |             |           |           |
|              |    |           |                |            | Lower Bound                 | Upper Bound |           |           |
| 15d CK       | 3  | 899.0000  | 16.8226        | 9.7125     | 857.2103                    | 940.7897    | 886.0000  | 918.0000  |
| 30d CK       | 3  | 1003.3333 | 21.5019        | 12.4142    | 949.9196                    | 1056.7471   | 982.0000  | 1025.0000 |
| 45d CK       | 3  | 1086.6667 | 13.6137        | 7.8599     | 1052.8483                   | 1120.4850   | 1076.0000 | 1102.0000 |
| 15d DS       | 3  | 956.3333  | 24.5832        | 14.1931    | 895.2653                    | 1017.4014   | 937.0000  | 984.0000  |
| 30d DS       | 3  | 995.0000  | 35.3836        | 20.4287    | 907.1022                    | 1082.8978   | 963.0000  | 1033.0000 |
| 45d DS       | 3  | 1052.0000 | 9.6437         | 5.5678     | 1028.0438                   | 1075.9562   | 1045.0000 | 1063.0000 |
| Total        | 18 | 998.7222  | 65.4431        | 15.4251    | 966.1781                    | 1031.2663   | 886.0000  | 1102.0000 |

|                                                        |        | N | Subset for alpha = 0.05 |          |           |           |
|--------------------------------------------------------|--------|---|-------------------------|----------|-----------|-----------|
|                                                        |        |   | 1                       | 2        | 3         | 4         |
| Duncan <sup>a</sup>                                    | 15d CK | 3 | 899.0000                |          |           |           |
|                                                        | 15d DS | 3 |                         | 956.3333 |           |           |
|                                                        | 30d DS | 3 |                         | 995.0000 | 995.0000  |           |
|                                                        | 30d CK | 3 |                         |          | 1003.3333 |           |
|                                                        | 45d DS | 3 |                         |          |           | 1052.0000 |
|                                                        | 45d CK | 3 |                         |          |           | 1086.6667 |
|                                                        | Sig.   |   | 1.000                   | 0.0520   | 0.6500    | 0.0770    |
| Means for groups in homogeneous subsets are displayed. |        |   |                         |          |           |           |
| a. Uses Harmonic Mean Sample Size = 3,000.             |        |   |                         |          |           |           |

**Table S10.** The effect of drought stress on the POD activity in *C. oleifera* pistils and stamens.

| Descriptives                |    |             |                |            |             |             |             |             |
|-----------------------------|----|-------------|----------------|------------|-------------|-------------|-------------|-------------|
| 95% Confidence Interval for |    |             |                |            |             |             |             |             |
|                             | N  | Mean        | Std. Deviation | Std. Error | Mean        |             | Minimum     | Maximum     |
|                             |    |             |                |            | Lower Bound | Upper Bound |             |             |
| 15d CK                      | 3  | 22,362.0000 | 496.0484       | 286.3937   | 21,129.7475 | 23,594.2525 | 21,842.0000 | 22,830.0000 |
| 30d CK                      | 3  | 25,599.0000 | 1037.7895      | 599.1680   | 23,020.9880 | 28,177.0120 | 24,452.0000 | 26,473.0000 |
| 45d CK                      | 3  | 30,337.6667 | 1509.9418      | 871.7653   | 26,586.7632 | 34,088.5701 | 29,352.0000 | 32,076.0000 |
| 15d DS                      | 3  | 24,930.3333 | 97.6797        | 56.3954    | 24,687.6834 | 25,172.9833 | 24,821.0000 | 25,009.0000 |
| 30d DS                      | 3  | 30,405.6667 | 565.2401       | 326.3415   | 29,001.5325 | 31,809.8008 | 29,890.0000 | 31,010.0000 |
| 45d DS                      | 3  | 35,575.0000 | 2013.6581      | 1162.5861  | 30,572.7959 | 40,577.2041 | 33,250.0000 | 36,762.0000 |
| Total                       | 18 | 28,201.6111 | 4614.9615      | 1087.7569  | 25,906.6448 | 30,496.5775 | 21,842.0000 | 36,762.0000 |

**Table S11.** The effect of drought stress on the significant difference in POD activity among groups of *C. oleifera* pistils and stamens.

|                                                        |        | N | Subset for alpha = 0.05 |             |             |             |
|--------------------------------------------------------|--------|---|-------------------------|-------------|-------------|-------------|
|                                                        |        |   | 1                       | 2           | 3           | 4           |
| Duncan <sup>a</sup>                                    | 15d CK | 3 | 22,362.0000             |             |             |             |
|                                                        | 15d DS | 3 |                         | 24,930.3333 |             |             |
|                                                        | 30d CK | 3 |                         | 25,599.0000 |             |             |
|                                                        | 45d CK | 3 |                         |             | 30,337.6667 |             |
|                                                        | 30d DS | 3 |                         |             | 30,405.6667 |             |
|                                                        | 45d DS | 3 |                         |             |             | 35,575.0000 |
|                                                        | Sig.   |   | 1.000                   | 0.4910      | 0.9440      | 1.000       |
| Means for groups in homogeneous subsets are displayed. |        |   |                         |             |             |             |
| a. Uses Harmonic Mean Sample Size = 3.000.             |        |   |                         |             |             |             |

**Table S12.** The effect of drought stress on the SOD activity in *C. oleifera* pistils and stamens.

|            | N  | Mean     | Std. Deviation | Std. Error | Descriptives                |             |          |          |
|------------|----|----------|----------------|------------|-----------------------------|-------------|----------|----------|
|            |    |          |                |            | 95% Confidence Interval for |             | Minimum  | Maximum  |
|            |    |          |                |            | Mean                        |             |          |          |
|            |    |          |                |            | Lower Bound                 | Upper Bound |          |          |
| HX45d DS   | 3  | 230.0000 | 10.59575       | 6.11746    | 203.6787                    | 256.3213    | 217.8000 | 236.9000 |
| 00HX30d DS | 3  | 165.4333 | 6.25247        | 3.60986    | 149.9013                    | 180.9653    | 159.7000 | 172.1000 |
| HX15d DS   | 3  | 145.7000 | 9.32577        | 5.38424    | 122.5335                    | 168.8665    | 136.8000 | 155.4000 |
| HX45d CK   | 3  | 182.8000 | 5.16430        | 2.98161    | 169.9712                    | 195.6288    | 178.7000 | 188.6000 |
| HX30d CK   | 3  | 152.6333 | 5.27857        | 3.04759    | 139.5206                    | 165.7460    | 146.6000 | 156.4000 |
| HX15d CK   | 2  | 119.3500 | 3.46482        | 2.45000    | 88.2198                     | 150.4802    | 116.9000 | 121.8000 |
| Total      | 17 | 168.7294 | 35.11721       | 8.51717    | 150.6738                    | 186.7850    | 116.9000 | 236.9000 |

|                                                        |          | N | Subset for alpha = 0.05 |          |          |          |          |
|--------------------------------------------------------|----------|---|-------------------------|----------|----------|----------|----------|
|                                                        |          |   | 1                       | 2        | 3        | 4        | 5        |
| Duncan <sup>a,b</sup>                                  | HX15d CK | 2 | 119.3500                |          |          |          |          |
|                                                        | HX15d DS | 3 |                         | 145.7000 |          |          |          |
|                                                        | HX30d CK | 3 |                         | 152.6333 | 152.6333 |          |          |
|                                                        | HX30d DS | 3 |                         |          | 165.4333 |          |          |
|                                                        | HX45d CK | 3 |                         |          |          | 182.8000 |          |
|                                                        | HX45d DS | 3 |                         |          |          |          | 230.0000 |
| Sig.                                                   |          |   | 1.000                   | 0.2920   | 0.0660   | 1.000    | 1.000    |
| Means for groups in homogeneous subsets are displayed. |          |   |                         |          |          |          |          |
| a. Uses Harmonic Mean Sample Size = 2.769.             |          |   |                         |          |          |          |          |

| Descriptives |    |         |                |            |                                  |             |         |         |
|--------------|----|---------|----------------|------------|----------------------------------|-------------|---------|---------|
|              | N  | Mean    | Std. Deviation | Std. Error | 95% Confidence Interval for Mean |             | Minimum | Maximum |
|              |    |         |                |            | Lower Bound                      | Upper Bound |         |         |
|              |    |         |                |            | 15d CK                           | 3           |         |         |
| 30d CK       | 3  | 23.9067 | 0.49642        | 0.28661    | 22.6735                          | 25.1398     | 23.3900 | 24.3800 |
| 45d CK       | 3  | 29.5667 | 0.65225        | 0.37658    | 27.9464                          | 31.1870     | 29.0900 | 30.3100 |
| 15d DS       | 3  | 24.0633 | 0.28361        | 0.16374    | 23.3588                          | 24.7679     | 23.8800 | 24.3900 |
| 30d DS       | 3  | 28.6100 | 0.98879        | 0.57088    | 26.1537                          | 31.0663     | 27.5400 | 29.4900 |
| 45d DS       | 3  | 32.2000 | 0.85610        | 0.49427    | 30.0733                          | 34.3267     | 31.5500 | 33.1700 |
| Total        | 18 | 26.3828 | 4.27842        | 1.00843    | 24.2552                          | 28.5104     | 19.4700 | 33.1700 |

|                     |        | N | Subset for alpha = 0.05 |         |         |         |
|---------------------|--------|---|-------------------------|---------|---------|---------|
|                     |        |   | 1                       | 2       | 3       | 4       |
| Duncan <sup>a</sup> | 15d CK | 3 | 19.9500                 |         |         |         |
|                     | 30d CK | 3 |                         | 23.9067 |         |         |
|                     | 15d DS | 3 |                         | 24.0633 |         |         |
|                     | 30d DS | 3 |                         |         | 28.6100 |         |
|                     | 45d CK | 3 |                         |         | 29.5667 |         |
|                     | 45d DS | 3 |                         |         |         | 32.2000 |
|                     | Sig.   |   | 1.000                   | 0.7850  | 0.1150  | 1.000   |

Means for groups in homogeneous subsets are displayed.  
a. Uses Harmonic Mean Sample Size = 3,000.

**Table S16.** The effect of drought stress on the SP content in *C. oleifera* pistils and stamens.

| Descriptives |    |        |                |            |                             |             |         |         |
|--------------|----|--------|----------------|------------|-----------------------------|-------------|---------|---------|
|              | N  | Mean   | Std. Deviation | Std. Error | 95% Confidence Interval for |             | Minimum | Maximum |
|              |    |        |                |            | Mean                        |             |         |         |
|              |    |        |                |            | Lower Bound                 | Upper Bound |         |         |
| 15d CK       | 3  | 2.2283 | 0.02532        | 0.01462    | 2.1654                      | 2.2912      | 2.2000  | 2.2500  |
| 30d CK       | 3  | 3.2517 | 0.14550        | 0.08400    | 2.8902                      | 3.6131      | 3.1200  | 3.4100  |
| 45d CK       | 3  | 4.1247 | 0.06734        | 0.03888    | 3.9574                      | 4.2919      | 4.0500  | 4.1800  |
| 15d DS       | 3  | 3.2477 | 0.20115        | 0.11614    | 2.7480                      | 3.7474      | 3.0800  | 3.4700  |
| 30d DS       | 3  | 4.3887 | 0.22715        | 0.13114    | 3.8244                      | 4.9529      | 4.2200  | 4.6500  |
| 45d DS       | 3  | 4.9533 | 0.15153        | 0.08749    | 4.5769                      | 5.3298      | 4.8600  | 5.1300  |
| Total        | 18 | 3.6991 | 0.92905        | 0.21898    | 3.2370                      | 4.1611      | 2.2000  | 5.1300  |

**Table S17.** The effect of drought stress on the significant difference in SP content among groups of *C. oleifera* pistils and stamens.

|                                                        |        | N | Subset for alpha = 0.05 |        |        |        |
|--------------------------------------------------------|--------|---|-------------------------|--------|--------|--------|
|                                                        |        |   | 1                       | 2      | 3      | 4      |
| Duncan <sup>a</sup>                                    | 15d CK | 3 | 2.2283                  |        |        |        |
|                                                        | 15d DS | 3 |                         | 3.2477 |        |        |
|                                                        | 30d CK | 3 |                         | 3.2517 |        |        |
|                                                        | 45d CK | 3 |                         |        | 4.1247 |        |
|                                                        | 30d DS | 3 |                         |        | 4.3887 |        |
|                                                        | 45d DS | 3 |                         |        |        | 4.9533 |
|                                                        | Sig.   |   | 1.000                   | 0.9750 | 0.0570 | 1.000  |
| Means for groups in homogeneous subsets are displayed. |        |   |                         |        |        |        |
| a. Uses Harmonic Mean Sample Size = 3.000.             |        |   |                         |        |        |        |

**Table S18.** The effect of drought stress on the Pro content in *C. oleifera* pistils and stamens.

| Descriptives |    |         |                |            |                             |             |         |          |
|--------------|----|---------|----------------|------------|-----------------------------|-------------|---------|----------|
|              | N  | Mean    | Std. Deviation | Std. Error | 95% Confidence Interval for |             | Minimum | Maximum  |
|              |    |         |                |            | Mean                        |             |         |          |
|              |    |         |                |            | Lower Bound                 | Upper Bound |         |          |
| 15d CK       | 3  | 56.4333 | 1.7411         | 1.0052     | 52.1082                     | 60.7585     | 54.4500 | 57.7100  |
| 30d CK       | 3  | 69.7667 | 2.5007         | 1.4438     | 63.5545                     | 75.9788     | 67.1200 | 72.0900  |
| 45d CK       | 3  | 89.3067 | 2.1200         | 1.2240     | 84.0403                     | 94.5731     | 87.1900 | 91.4300  |
| 15d DS       | 3  | 70.1967 | 0.7586         | 0.4380     | 68.3123                     | 72.0811     | 69.3300 | 70.7400  |
| 30d DS       | 3  | 88.2500 | 4.0146         | 2.3178     | 78.2773                     | 98.2227     | 83.6700 | 91.1600  |
| 45d DS       | 3  | 97.1033 | 4.7045         | 2.7161     | 85.4168                     | 108.7899    | 92.7000 | 102.0600 |
| Total        | 18 | 78.5094 | 14.7039        | 3.4657     | 71.1974                     | 85.8215     | 54.4500 | 102.0600 |

|                     |        | N | Subset for alpha = 0.05 |         |         |         |
|---------------------|--------|---|-------------------------|---------|---------|---------|
|                     |        |   | 1                       | 2       | 3       | 4       |
| Duncan <sup>a</sup> | 15d CK | 3 | 56.4333                 |         |         |         |
|                     | 30d CK | 3 |                         | 69.7667 |         |         |
|                     | 15d DS | 3 |                         | 70.1967 |         |         |
|                     | 30d DS | 3 |                         |         | 88.2500 |         |
|                     | 45d CK | 3 |                         |         | 89.3067 |         |
|                     | 45d DS | 3 |                         |         |         | 97.1033 |
|                     | Sig.   |   | 1.000                   | 0.8620  | 0.6700  | 1.000   |

Means for groups in homogeneous subsets are displayed.  
a. Uses Harmonic Mean Sample Size = 3.000.

**Table S20.** The effect of drought stress on the ABA content in *C. oleifera* pistils and stamens.

| Descriptives |    |          |                |            |                             |             |          |          |
|--------------|----|----------|----------------|------------|-----------------------------|-------------|----------|----------|
|              | N  | Mean     | Std. Deviation | Std. Error | 95% Confidence Interval for |             | Minimum  | Maximum  |
|              |    |          |                |            | Mean                        |             |          |          |
|              |    |          |                |            | Lower Bound                 | Upper Bound |          |          |
| 15d CK       | 3  | 131.9600 | 3.5514         | 2.0504     | 123.1378                    | 140.7822    | 129.8400 | 136.0600 |
| 15d DS       | 3  | 388.2700 | 4.4878         | 2.5910     | 377.1217                    | 399.4183    | 383.3600 | 392.1600 |
| 30d CK       | 3  | 68.3900  | 0.8489         | 0.4901     | 66.2811                     | 70.4989     | 67.4100  | 68.9000  |
| 30d DS       | 3  | 474.8233 | 9.0475         | 5.2236     | 452.3481                    | 497.2985    | 467.7900 | 485.0300 |
| 45d CK       | 3  | 51.6533  | 1.1927         | 0.6886     | 48.6906                     | 54.6161     | 50.7700  | 53.0100  |
| 45d DS       | 3  | 211.4833 | 2.7328         | 1.5778     | 204.6948                    | 218.2719    | 208.3800 | 213.5300 |
| Total        | 18 | 221.0967 | 164.0347       | 38.6633    | 139.5242                    | 302.6692    | 50.7700  | 485.0300 |

|                                                        |        |   | Subset for alpha = 0.05 |         |          |          |          |          |
|--------------------------------------------------------|--------|---|-------------------------|---------|----------|----------|----------|----------|
| N                                                      |        |   | 1                       | 2       | 3        | 4        | 5        | 6        |
| Duncan <sup>a</sup>                                    | 45d CK | 3 | 51.6533                 |         |          |          |          |          |
|                                                        | 30d CK | 3 |                         | 68.3900 |          |          |          |          |
|                                                        | 15d CK | 3 |                         |         | 131.9600 |          |          |          |
|                                                        | 45d DS | 3 |                         |         |          | 211.4833 |          |          |
|                                                        | 15d DS | 3 |                         |         |          |          | 388.2700 |          |
|                                                        | 30d DS | 3 |                         |         |          |          |          | 474.8233 |
|                                                        | Sig.   |   | 1.000                   | 1.000   | 1.000    | 1.000    | 1.000    | 1.000    |
| Means for groups in homogeneous subsets are displayed. |        |   |                         |         |          |          |          |          |
| a. Uses Harmonic Mean Sample Size = 3,000.             |        |   |                         |         |          |          |          |          |

**Table S22.** The effect of drought stress on the GA<sub>3</sub> content in *C. oleifera* pistils and stamens.

| Descriptives |    |        |                |            |                             |             |         |         |
|--------------|----|--------|----------------|------------|-----------------------------|-------------|---------|---------|
|              | N  | Mean   | Std. Deviation | Std. Error | 95% Confidence Interval for |             | Minimum | Maximum |
|              |    |        |                |            | Mean                        |             |         |         |
|              |    |        |                |            | Lower Bound                 | Upper Bound |         |         |
| 15d CK       | 3  | 0.1160 | 0.01709        | 0.0099     | 0.0736                      | 0.1584      | 0.1000  | 0.1300  |
| 15d DS       | 3  | 0.3433 | 0.02369        | 0.0137     | 0.2845                      | 0.4022      | 0.3200  | 0.3600  |
| 30d CK       | 3  | 0.1653 | 0.00751        | 0.0043     | 0.1467                      | 0.1840      | 0.1600  | 0.1700  |
| 30d DS       | 3  | 0.5203 | 0.03017        | 0.0174     | 0.4454                      | 0.5953      | 0.5000  | 0.5600  |
| 45d CK       | 3  | 0.1297 | 0.01721        | 0.0099     | 0.0869                      | 0.1724      | 0.1100  | 0.1400  |
| 45d DS       | 3  | 0.4383 | 0.03623        | 0.0209     | 0.3483                      | 0.5283      | 0.4000  | 0.4700  |
| Total        | 18 | 0.2855 | 0.16356        | 0.0386     | 0.2042                      | 0.3668      | 0.1000  | 0.5600  |

**Table S23.** The effect of drought stress on the significant difference in GA<sub>3</sub> content among groups of *C. oleifera* pistils and stamens.

|                                                        |        | N | Subset for alpha = 0.05 |        |        |        |        |
|--------------------------------------------------------|--------|---|-------------------------|--------|--------|--------|--------|
|                                                        |        |   | 1                       | 2      | 3      | 4      | 5      |
| Duncan <sup>a</sup>                                    | 15d CK | 3 | 0.1160                  |        |        |        |        |
|                                                        | 45d CK | 3 | 0.1297                  | 0.1297 |        |        |        |
|                                                        | 30d CK | 3 |                         | 0.1653 |        |        |        |
|                                                        | 15d DS | 3 |                         |        | 0.3433 |        |        |
|                                                        | 45d DS | 3 |                         |        |        | 0.4383 |        |
|                                                        | 30d DS | 3 |                         |        |        |        | 0.5203 |
|                                                        | Sig.   |   | 0.4970                  | 0.0930 | 1.000  | 1.000  | 1.000  |
| Means for groups in homogeneous subsets are displayed. |        |   |                         |        |        |        |        |
| a. Uses Harmonic Mean Sample Size = 3.000.             |        |   |                         |        |        |        |        |

**Table S24.** The effect of drought stress on the IAA content in *C. oleifera* pistils and stamens.

| Descriptives |    |        |                |            |                             |             |         |         |
|--------------|----|--------|----------------|------------|-----------------------------|-------------|---------|---------|
|              | N  | Mean   | Std. Deviation | Std. Error | 95% Confidence Interval for |             | Minimum | Maximum |
|              |    |        |                |            | Mean                        |             |         |         |
|              |    |        |                |            | Lower Bound                 | Upper Bound |         |         |
| 15d CK       | 3  | 0.9510 | 0.1431         | 0.0826     | 0.5954                      | 1.3066      | 0.8220  | 1.1050  |
| 15d DS       | 3  | 1.0913 | 0.0356         | 0.0205     | 1.0030                      | 1.1797      | 1.0570  | 1.1280  |
| 30d CK       | 3  | 1.1677 | 0.1697         | 0.0980     | 0.7461                      | 1.5892      | 1.0030  | 1.3420  |
| 30d DS       | 3  | 1.9737 | 0.1123         | 0.0648     | 1.6948                      | 2.2526      | 1.8460  | 2.0570  |
| 45d CK       | 3  | 1.4533 | 0.0936         | 0.0540     | 1.2209                      | 1.6858      | 1.3810  | 1.5590  |
| 45d DS       | 3  | 2.5373 | 0.2944         | 0.1700     | 1.8060                      | 3.2687      | 2.2610  | 2.8470  |
| Total        | 18 | 1.5291 | 0.5914         | 0.1394     | 1.2349                      | 1.8232      | 0.8220  | 2.8470  |



|                     |        | N | Subset for alpha = 0.05 |        |        |        |
|---------------------|--------|---|-------------------------|--------|--------|--------|
|                     |        |   | 1                       | 2      | 3      | 4      |
| Duncan <sup>a</sup> | 15d CK | 3 | 0.9510                  |        |        |        |
|                     | 15d DS | 3 | 1.0913                  |        |        |        |
|                     | 30d CK | 3 | 1.1677                  | 1.1677 |        |        |
|                     | 45d CK | 3 |                         | 1.4533 |        |        |
|                     | 30d DS | 3 |                         |        | 1.9737 |        |
|                     | 45d DS | 3 |                         |        |        | 2.5373 |
|                     | Sig.   |   | 0.1460                  | 0.0520 | 1.000  | 1.000  |

Means for groups in homogeneous subsets are displayed.  
a. Uses Harmonic Mean Sample Size = 3.000.

| Descriptives |    |        |                |            |                                  |             |         |         |
|--------------|----|--------|----------------|------------|----------------------------------|-------------|---------|---------|
|              | N  | Mean   | Std. Deviation | Std. Error | 95% Confidence Interval for Mean |             | Minimum | Maximum |
|              |    |        |                |            | Lower Bound                      | Upper Bound |         |         |
|              |    |        |                |            |                                  |             |         |         |
| 15d CK       | 3  | 2.1317 | 0.2110         | 0.1218     | 1.6076                           | 2.6557      | 1.9000  | 2.3000  |
| 15d DS       | 3  | 2.0750 | 0.0880         | 0.0508     | 1.8564                           | 2.2936      | 1.9800  | 2.1600  |
| 30d CK       | 3  | 2.9417 | 0.1623         | 0.0937     | 2.5385                           | 3.3448      | 2.7700  | 3.0900  |
| 30d DS       | 3  | 2.0673 | 0.0860         | 0.0497     | 1.8536                           | 2.2810      | 2.0100  | 2.1700  |
| 45d CK       | 3  | 1.4897 | 0.1032         | 0.0596     | 1.2334                           | 1.7459      | 1.3900  | 1.6000  |
| 45d DS       | 3  | 5.4937 | 0.2865         | 0.1654     | 4.7819                           | 6.2055      | 5.1700  | 5.6900  |
| Total        | 18 | 2.6998 | 1.3652         | 0.3218     | 2.0209                           | 3.3787      | 1.3900  | 5.6900  |

|                                                        |        | N | Subset for alpha = 0.05 |        |        |        |
|--------------------------------------------------------|--------|---|-------------------------|--------|--------|--------|
|                                                        |        |   | 1                       | 2      | 3      | 4      |
| Duncan <sup>a</sup>                                    | 45d CK | 3 | 1.4897                  |        |        |        |
|                                                        | 30d DS | 3 |                         | 2.0673 |        |        |
|                                                        | 15d DS | 3 |                         | 2.0750 |        |        |
|                                                        | 15d CK | 3 |                         | 2.1317 |        |        |
|                                                        | 30d CK | 3 |                         |        | 2.9417 |        |
|                                                        | 45d DS | 3 |                         |        |        | 5.4937 |
|                                                        | Sig.   |   | 1.000                   | 0.6720 | 1.000  | 1.000  |
| Means for groups in homogeneous subsets are displayed. |        |   |                         |        |        |        |
| a. Uses Harmonic Mean Sample Size = 3,000.             |        |   |                         |        |        |        |

**Table S28.** The effect of drought stress on the SA content in *C. oleifera* pistils and stamens.

| Descriptives |      |                |            |                             |             |           |         |         |
|--------------|------|----------------|------------|-----------------------------|-------------|-----------|---------|---------|
| N            | Mean | Std. Deviation | Std. Error | 95% Confidence Interval for |             |           |         |         |
|              |      |                |            | Mean                        |             | Minimum   | Maximum |         |
|              |      |                |            | Lower Bound                 | Upper Bound |           |         |         |
| 15d CK       | 3    | 1490.7333      | 21.01650   | 12.13388                    | 1438.5254   | 1542.9412 | 1478.40 | 1515.00 |
| 15d DS       | 3    | 1844.1667      | 15.20077   | 8.77617                     | 1806.4059   | 1881.9275 | 1826.70 | 1854.40 |
| 30d CK       | 3    | 1379.6333      | 15.05468   | 8.69182                     | 1342.2354   | 1417.0312 | 1364.80 | 1394.90 |
| 30d DS       | 3    | 1449.2667      | 5.57524    | 3.21887                     | 1435.4170   | 1463.1163 | 1445.10 | 1455.60 |
| 45d CK       | 3    | 609.4333       | 7.78224    | 4.49308                     | 590.1012    | 628.7655  | 602.80  | 618.00  |
| 45d DS       | 3    | 643.9000       | 7.12671    | 4.11461                     | 626.1963    | 661.6037  | 635.70  | 648.60  |
| Total        | 18   | 1236.1889      | 468.67740  | 110.46832                   | 1003.1211   | 1469.2567 | 602.80  | 1854.40 |

**Table S29.** The effect of drought stress on the significant difference in SA content among groups of *C. oleifera* pistils and stamens.

|                                                        |        | N | Subset for alpha = 0.05 |          |           |           |           |           |
|--------------------------------------------------------|--------|---|-------------------------|----------|-----------|-----------|-----------|-----------|
|                                                        |        |   | 1                       | 2        | 3         | 4         | 5         | 6         |
| Duncan <sup>a</sup>                                    | 45d CK | 3 | 609.4333                |          |           |           |           |           |
|                                                        | 45d DS | 3 |                         | 643.9000 |           |           |           |           |
|                                                        | 30d CK | 3 |                         |          | 1379.6333 |           |           |           |
|                                                        | 30d DS | 3 |                         |          |           | 1449.2667 |           |           |
|                                                        | 15d CK | 3 |                         |          |           |           | 1490.7333 |           |
|                                                        | 15d DS | 3 |                         |          |           |           |           | 1844.1667 |
|                                                        | Sig.   |   | 1.000                   | 1.000    | 1.000     | 1.000     | 1.000     | 1.000     |
| Means for groups in homogeneous subsets are displayed. |        |   |                         |          |           |           |           |           |
| a. Uses Harmonic Mean Sample Size = 3.000.             |        |   |                         |          |           |           |           |           |

**Table S30.** The effect of drought stress on the JA content in *C. oleifera* pistils and stamens.

| Descriptives |      |                |            |                             |             |         |         |         |
|--------------|------|----------------|------------|-----------------------------|-------------|---------|---------|---------|
| N            | Mean | Std. Deviation | Std. Error | 95% Confidence Interval for |             |         |         |         |
|              |      |                |            | Mean                        |             | Minimum | Maximum |         |
|              |      |                |            | Lower Bound                 | Upper Bound |         |         |         |
| 15d CK       | 3    | 15.1240        | 0.4868     | 0.2811                      | 13.9146     | 16.3334 | 14.6670 | 15.6360 |
| 15d DS       | 3    | 17.3020        | 0.5689     | 0.3284                      | 15.8888     | 18.7152 | 16.7030 | 17.8350 |
| 30d CK       | 3    | 7.2870         | 0.2578     | 0.1489                      | 6.6465      | 7.9275  | 7.0100  | 7.5200  |
| 30d DS       | 3    | 4.1243         | 0.1065     | 0.0615                      | 3.8599      | 4.3888  | 4.0020  | 4.1960  |
| 45d CK       | 3    | 2.4610         | 0.0265     | 0.0153                      | 2.3951      | 2.5269  | 2.4340  | 2.4870  |
| 45d DS       | 3    | 0.6290         | 0.1004     | 0.0579                      | 0.3797      | 0.8783  | 0.5150  | 0.7040  |
| Total        | 18   | 7.8212         | 6.4816     | 1.5277                      | 4.5980      | 11.0444 | 0.5150  | 17.8350 |

**Table S31.** The effect of drought stress on the significant difference in JA content among groups of *C. oleifera* pistils and stamens.

|                                                        |        | N | Subset for alpha = 0.05 |        |        |        |         |         |
|--------------------------------------------------------|--------|---|-------------------------|--------|--------|--------|---------|---------|
|                                                        |        |   | 1                       | 2      | 3      | 4      | 5       | 6       |
| Duncan <sup>a</sup>                                    | 45d DS | 3 | 0.6290                  |        |        |        |         |         |
|                                                        | 45d CK | 3 |                         | 2.4610 |        |        |         |         |
|                                                        | 30d DS | 3 |                         |        | 4.1243 |        |         |         |
|                                                        | 30d CK | 3 |                         |        |        | 7.2870 |         |         |
|                                                        | 15d CK | 3 |                         |        |        |        | 15.1240 |         |
|                                                        | 15d DS | 3 |                         |        |        |        |         | 17.3020 |
|                                                        | Sig.   |   | 1.000                   | 1.000  | 1.000  | 1.000  | 1.000   | 1.000   |
| Means for groups in homogeneous subsets are displayed. |        |   |                         |        |        |        |         |         |
| a. Uses Harmonic Mean Sample Size = 3,000.             |        |   |                         |        |        |        |         |         |
